# Supplementary material for: European primary emissions of criteria pollutants and greenhouse gases in 2020 modulated by the COVID-19 pandemic disruptions
Source: Copernicus journal article supplement (doi:10.5194/essd-14-2521-2022), 2022-06-02
Supplement: Supplementary file 1 [file essd-14-2521-2022-supplement.pdf]

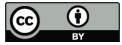

*Supplement of*

## **European primary emissions of criteria pollutants and greenhouse gases in 2020 modulated by the COVID-19 pandemic disruptions**

**Marc Guevara et al.**

*Correspondence to:* Marc Guevara ([marc.guevara@bsc.es](mailto:marc.guevara@bsc.es))

The copyright of individual parts of the supplement might differ from the article licence.

## Supplementary material

Table S1: List of countries (sea regions) included in the COVID-19 emission adjustment factors per GNFR sector

| Sector                                   | Description                            | Countries included                                                                                                                                                                                                                                                                                                                                                                        |
|------------------------------------------|----------------------------------------|-------------------------------------------------------------------------------------------------------------------------------------------------------------------------------------------------------------------------------------------------------------------------------------------------------------------------------------------------------------------------------------------|
| GNFR_A                                   | Energy industry                        | 30: Austria, Belgium, Bulgaria, Czech Republic, Germany, Denmark, Estonia, Spain, Finland, France, United Kingdom, Greece, Croatia, Hungary, Ireland, Italy, Lithuania, Latvia, Netherlands, Norway, Poland, Portugal, Romania, Russia, Sweden, Switzerland, Slovakia, Slovenia, Turkey, Ukraine                                                                                          |
| GNFR_B                                   | Manufacturing industry                 | 32: Austria, Bosnia and Herzegovina, Belgium, Bulgaria, Switzerland, Czech Republic, Cyprus, Germany, Denmark, Estonia, Spain, France, Finland, United Kingdom, Greece, Croatia, Hungary, Italy, Lithuania, Latvia, Malta, Luxembourg, Netherlands, Norway, Poland, Portugal, Romania, Serbia, Sweden, Slovakia, Slovenia, Turkey                                                         |
| GNFR_C                                   | Other stationary combustion activities | 35: Austria, Bosnia and Herzegovina, Belgium, Bulgaria, Czech Republic, Switzerland, Germany, Denmark, Estonia, Spain, France, Finland, United Kingdom, Greece, Croatia, Hungary, Ireland, Italy, Lithuania, Latvia, Luxembourg, Malta, Moldova, Macedonia, Netherlands, Norway, Poland, Portugal, Romania, Russia, Sweden, Slovakia, Slovenia, Turkey, Ukraine                           |
| GNFR_D                                   | Fugitive emissions from fossil fuels   | 32: Austria, Bosnia and Herzegovina, Belgium, Bulgaria, Switzerland, Czech Republic, Cyprus, Germany, Denmark, Estonia, Spain, France, Finland, United Kingdom, Greece, Croatia, Hungary, Italy, Lithuania, Latvia, Malta, Luxembourg, Netherlands, Norway, Poland, Portugal, Romania, Serbia, Sweden, Slovakia, Slovenia, Turkey                                                         |
| GNFR_E                                   | Solvents                               | 23: Austria, Belgium, Bulgaria, Czech Republic, Germany, Denmark, Estonia, Spain, France, Finland, United Kingdom, Greece, Hungary, Italy, Lithuania, Latvia, Netherlands, Norway, Poland, Portugal, Romania, Sweden, Turkey                                                                                                                                                              |
| GNFR_F1<br>GNFR_F2<br>GNFR_F3<br>GNFR_F4 | Road Transport                         | 36: Austria, Bosnia and Herzegovina, Belgium, Belarus, Bulgaria, Czech Republic, Switzerland, Germany, Denmark, Estonia, Spain, France, Finland, United Kingdom, Greece, Croatia, Hungary, Ireland, Italy, Lithuania, Latvia, Luxembourg, Malta, Moldova, Macedonia, Netherlands, Norway, Poland, Portugal, Romania, Russia, Sweden, Slovakia, Slovenia, Turkey, Ukraine                  |
| GNFR_G                                   | Shipping                               | Atlantic Ocean, Baltic Sea, Black Sea, Caspian Sea, English Channel, Greenland Sea, Irish Sea, Kara Sea, Mediterranean Sea, North Sea, Norwegian Sea                                                                                                                                                                                                                                      |
| GNFR_H                                   | Aviation                               | 39: Albania, Armenia, Austria, Bosnia and Herzegovina, Belgium, Bulgaria, Switzerland, Cyprus, Czech Republic, Denmark, Germany, Estonia, Spain, Finland, France, United Kingdom, Greece, Croatia, Hungary, Ireland, Italy, Latvia, Luxembourg, Lithuania, Malta, Morocco, Moldova, Montenegro, Netherlands, Norway, Poland, Portugal, Romania, Serbia, Sweden, Slovakia, Turkey, Ukraine |
| GNFR_I                                   | Off-road transport                     | 32: Austria, Bosnia and Herzegovina, Belgium, Bulgaria, Switzerland, Czech Republic, Cyprus, Germany, Denmark, Estonia, Spain, France, Finland, United Kingdom, Greece, Croatia, Hungary, Italy, Lithuania, Latvia, Malta, Luxembourg, Netherlands, Norway, Poland, Portugal, Romania, Serbia, Sweden, Slovakia, Slovenia, Turkey                                                         |

**Table S2: Energy consumption by subsectors of the Spanish commercial/institutional sector (IDAE, 2018) and estimated changes in the energy demand due to the COVID-19 restrictions.**

|                                                                            | <b>Fossil fuel + biomass consumption (ktep)</b> | <b>Fossil fuel + biomass consumption (%)</b> | <b>Change due to COVID-19 restrictions</b> | <b>Change in consumption (%)</b> |
|----------------------------------------------------------------------------|-------------------------------------------------|----------------------------------------------|--------------------------------------------|----------------------------------|
| Workplaces                                                                 | 977                                             | 26.5%                                        | -80%                                       | -21.2%                           |
| Hospitals                                                                  | 428                                             | 11.6%                                        | 50%                                        | 5.8%                             |
| Commercial buildings                                                       | 1509                                            | 40.9%                                        | -80%                                       | -32.8%                           |
| Restaurants and hotels                                                     | 160                                             | 4.3%                                         | -90%                                       | -3.9%                            |
| Schools and universities                                                   | 287                                             | 7.8%                                         | -100%                                      | -7.8%                            |
| Other buildings                                                            | 325                                             | 8.8%                                         | -80%                                       | -7.0%                            |
| <b>Overall change in fossil fuel + biomass consumption due to COVID-19</b> |                                                 |                                              |                                            | <b>-66.9%</b>                    |

GNFR\_A: Public Power

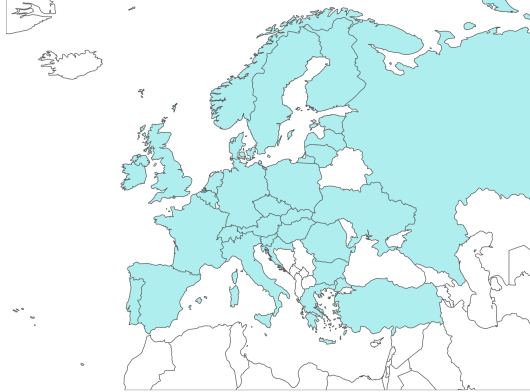

GNFR\_B: Manufacturing Industry

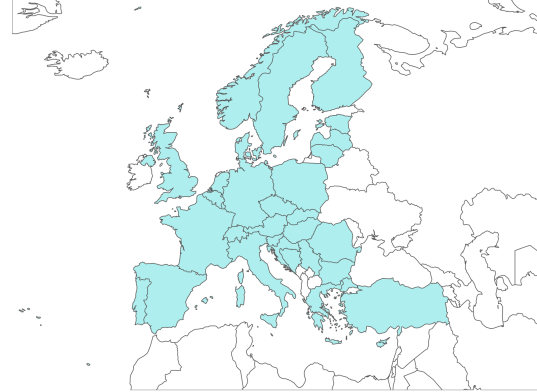

GNFR\_C: Other Stationary Combustion Activities

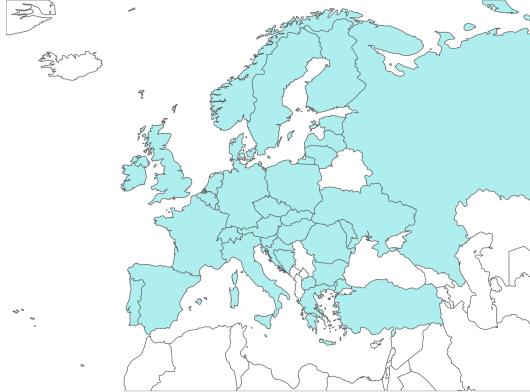

GNFR\_D: Fugitive Emissions from Fossil Fuels

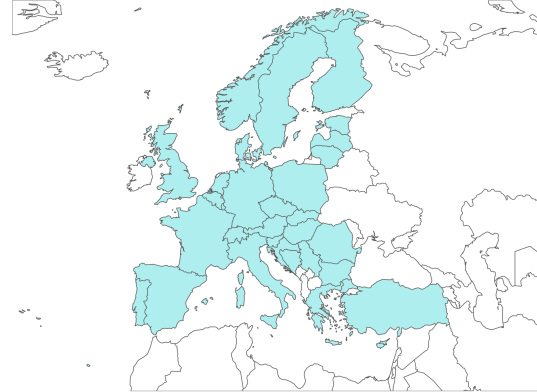

GNFR\_E: Solvents

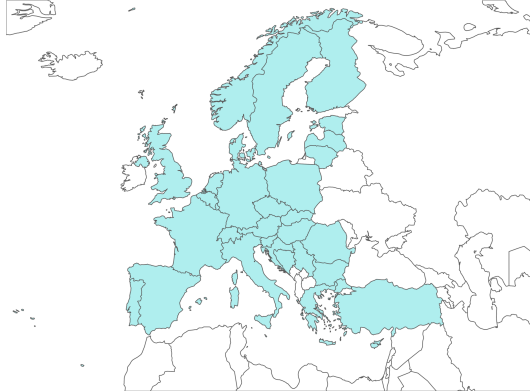

GNFR\_F: Road Transport

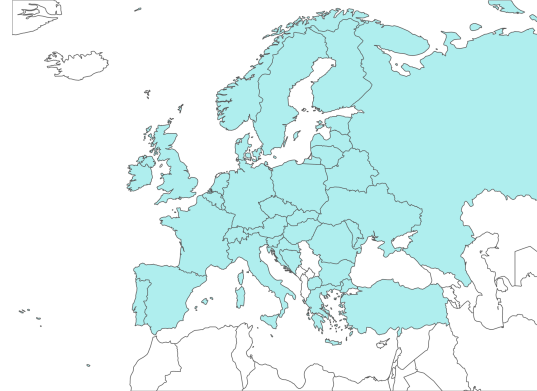

GNFR\_H: Aviation

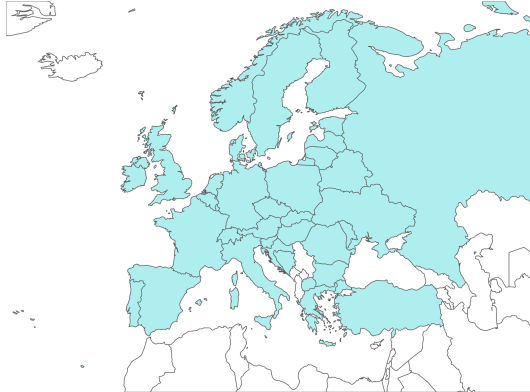

GNFR\_I: Off-road Transport

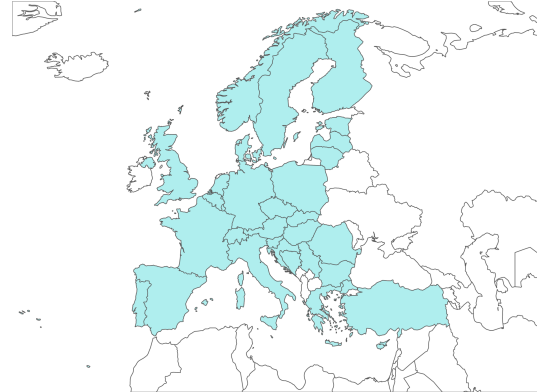

**Figure S1: Spatial coverage of the COVID-19 emission adjustment factors constructed for each GNFR sector. Countries included in the database are highlighted in light turquoise**

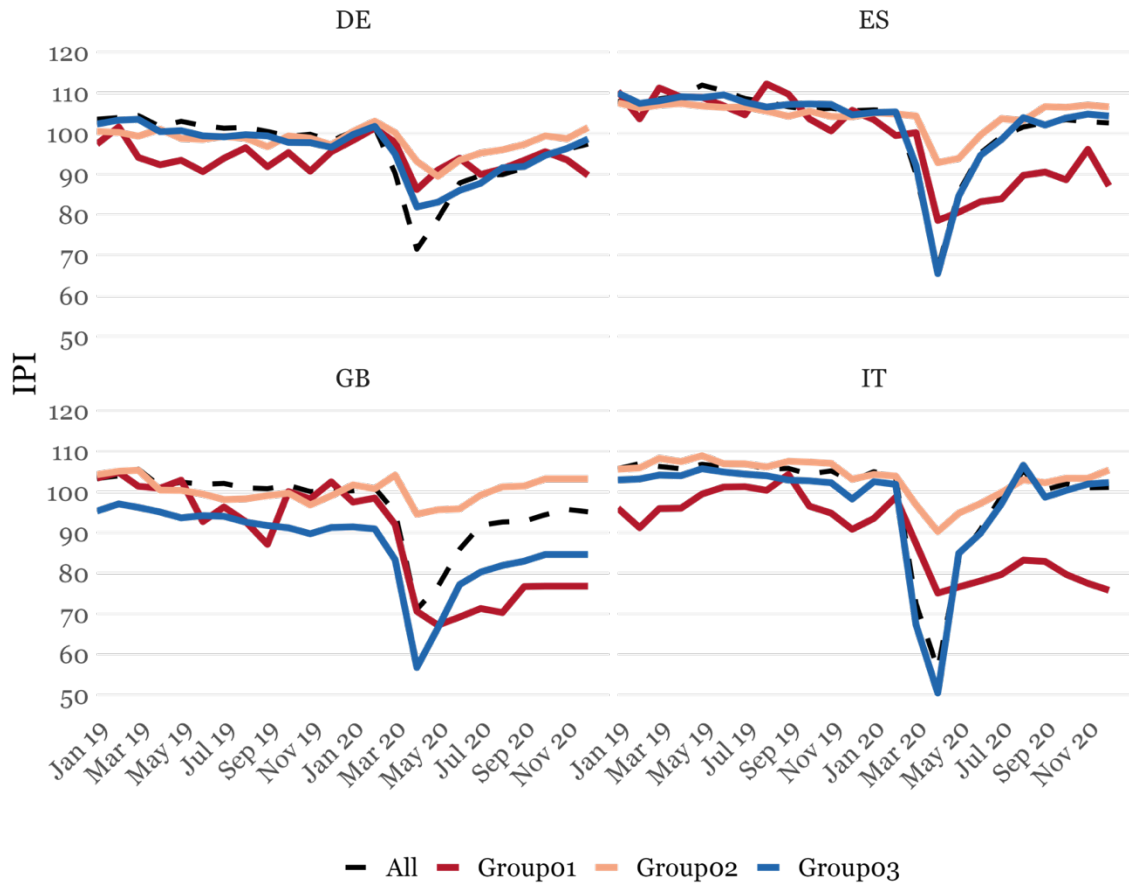

**Figure S2 Evolution of the average monthly Industrial Production Index (IPI) values (January 2019 to December 2020) for four manufacturing categories: Group01 (petroleum refining products), Group02 (pharmaceutical, chemistry, food and beverages products), Group03 (non-metallic mineral products, basic metals, paper and machinery and equipment) and All (general index for all the manufacturing industry). Results are presented for Germany (DE), Spain (ES), Italy (IT) and the United Kingdom (GB). The IPI values are seasonally and calendar adjusted data (Eurostat, 2021a)**

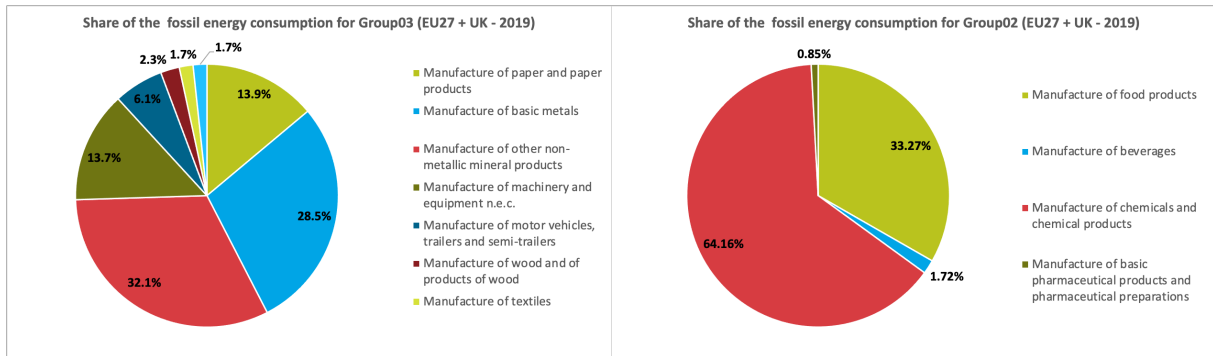

**Figure S3: Relative fossil energy consumption in the GNFR\_B3 - Manufacture of other products (left) and GNFR\_B2 - Manufacture of pharmaceutical, chemistry, food and beverages products – (right) manufacturing industry subcategories per industrial branch in the EU27 + UK during 2019 (Eurostat, 2021b).**

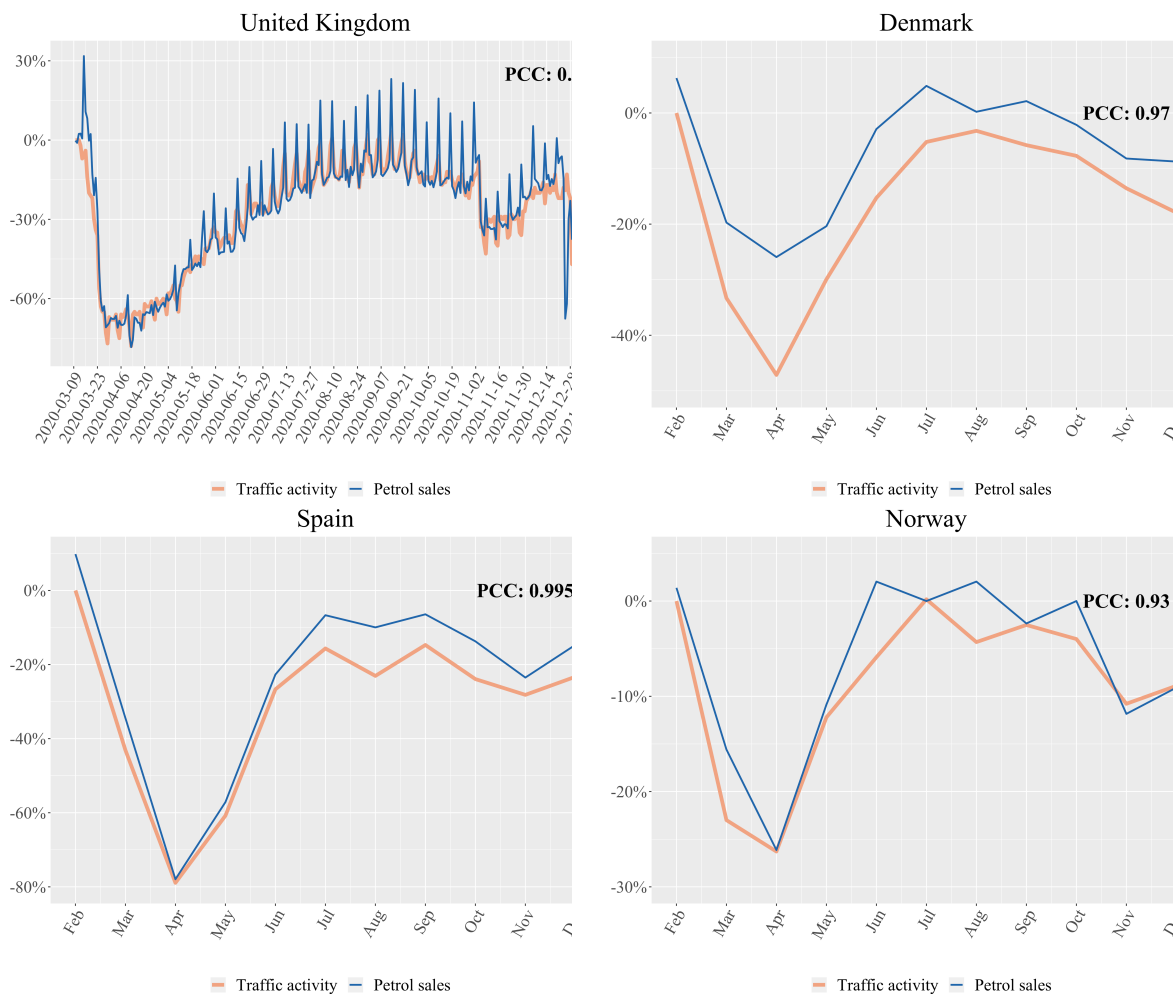

**Figure S4: Weekly (UK) and monthly (Denmark, Spain, Norway) changes in traffic activity (orange line) and petrol sales (blue line) due to COVID-19 restrictions during 2020. Correlation between the two parameters is represented with the Pearson correlation coefficient (PCC).**

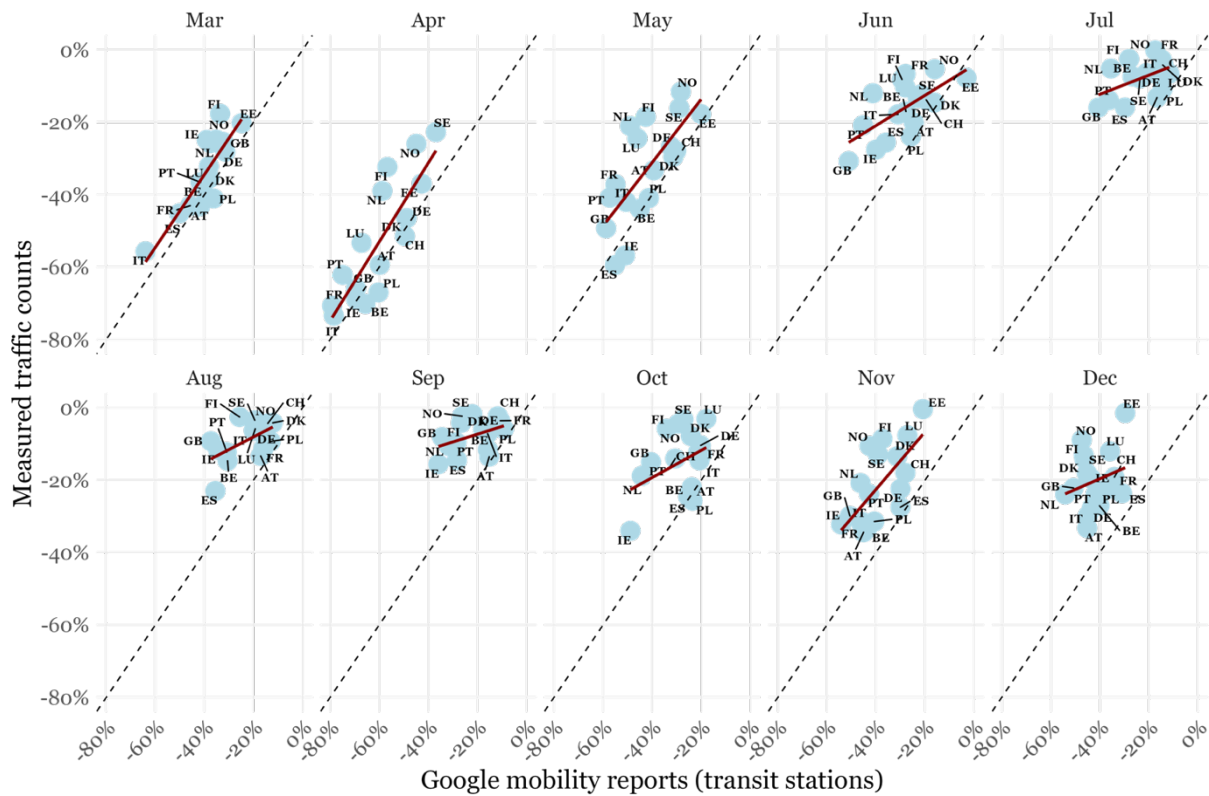

Figure S5: Comparison between averaged monthly adjustment factors for road traffic reported by Google COVID-19 Community Mobility Reports (Google LLC, 2021) and light duty vehicles and cars (LDV) measured-based trends per country (see Table A1 of the paper for references).

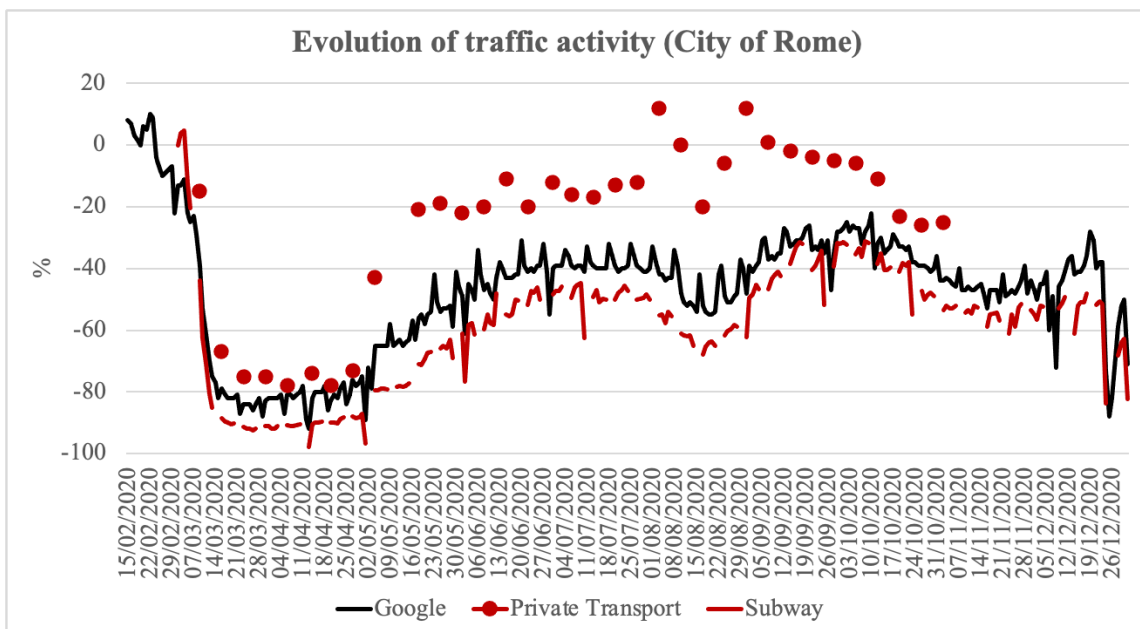

Figure S6: Comparison of Google LCC (2021) traffic movement trends with the evolution of the private transport and access to subway reported by Roma Mobilita (2021) for the city of Rome and the period 21 February to 31 December 2020.

## Relative Emission Changes by Pollutant and Month

EU-27 + UK

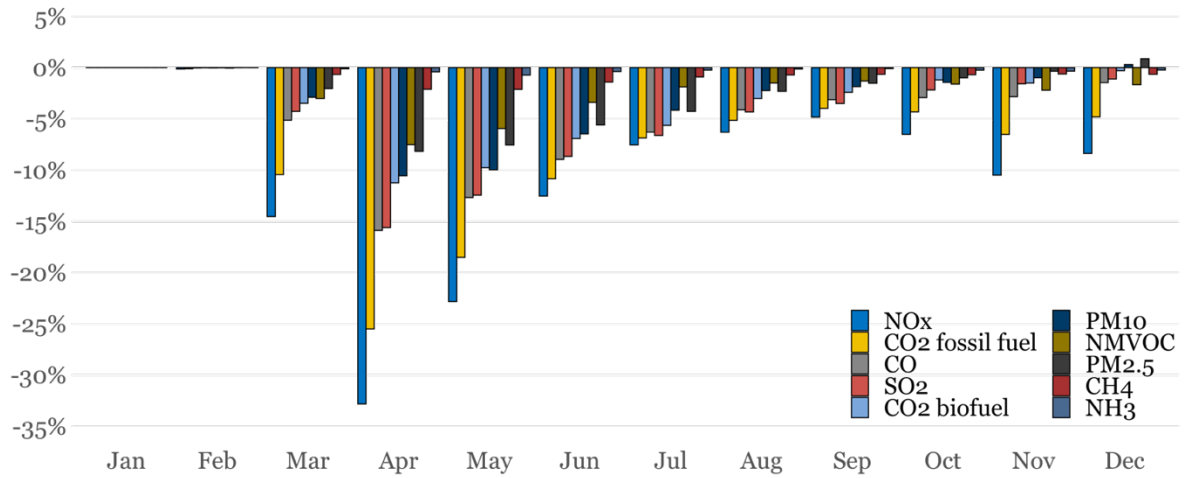

Figure S7: Relative decline in monthly emissions [%] by pollutant between January and December 2020 for EU27 + UK.

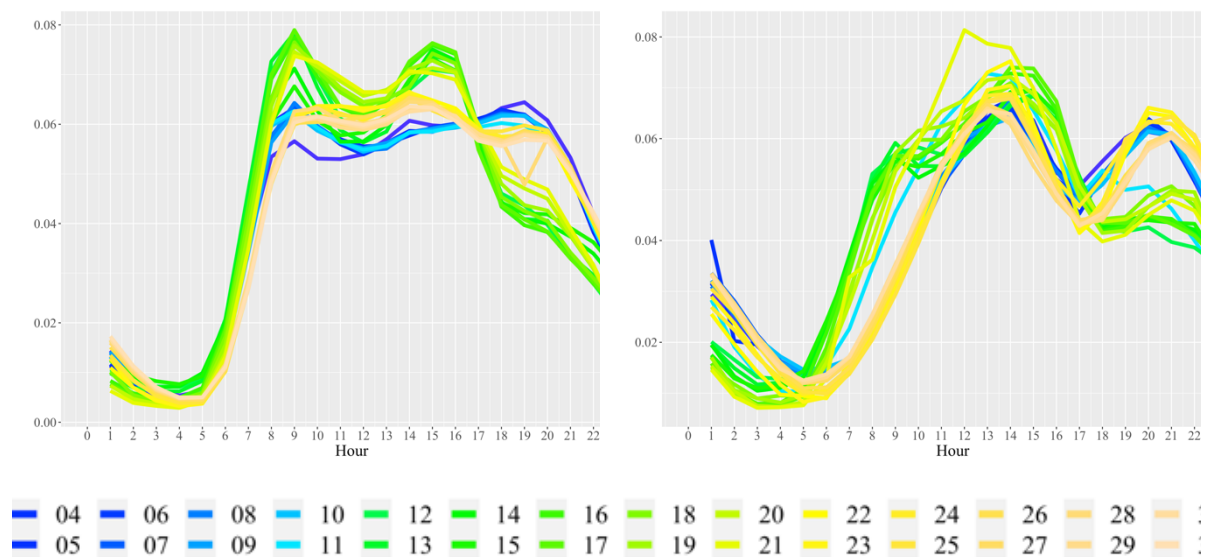

Figure S8. Hourly temporal profiles derived from measured-traffic counts in Madrid city for the year 2020 (AM, 2021) for weekdays (left) and Saturdays (right) discriminated by week of the year (week 4 to week 29)



## References

AM: Madrid city council. Permanent traffic counts. Available at: <https://datos.madrid.es/portal/site/egob/menuitem.c05c1f754a33a9fbe4b2e4b284f1a5a0/?vgnextoid=fabff3e1de124610VgnVCM2000001f4a900aRCRD&vgnnextchannel=374512b9ace9f310VgnVCM100000171f5a0aRCRD&vgnnextfmt=default> (last accessed, May 2021) 2021.

Eurostat: Industrial Production Index overview. Available at: [https://ec.europa.eu/eurostat/statistics-explained/index.php/Industrial\\_production\\_\(volume\)\\_index\\_overview](https://ec.europa.eu/eurostat/statistics-explained/index.php/Industrial_production_(volume)_index_overview) (last accessed, May 2021), 2021a.

Eurostat: Energy balances – 2021 edition. Available at: <https://ec.europa.eu/eurostat/web/energy/data/energy-balances> (last accessed, July 2021), 2021b.

Google LLC. Google COVID-19 Community Mobility Reports. Available at: <https://www.google.com/covid19/mobility/> (last access: March 2021), 2021.

IDAE. Institute for Diversification and Saving of Energy. Detail of service sector consumption. Available at: <https://www.idae.es/en/studies-reports-and-statistics> (last access: September 2020), 2018.

Roma Mobilita: COVID-19: impact on mobility. Available at: <https://romamobilita.it/it/covid-19-impatto-sulla-mobilita> (last accessed, May 2021), 2021.
